# Supplementary material for: Predictive Modeling of Poor Outcome in Severe COVID-19: A Single-Center Observational Study Based on Clinical, Cytokine and Laboratory Profiles
Source: MDPI journal article supplement (doi:10.3390/jcm10225431), 2021-11-20
Supplement: s1 [file s1]

## Supplementary Materials:

**Table S1.** Comparison of the cytokine profile.

|         | <b>Intubation or<br/>death<br/>(N = 40)</b> | <b>Non-<br/>Intubation or<br/>death<br/>(N = 68)</b> | <b>P value</b> |
|---------|---------------------------------------------|------------------------------------------------------|----------------|
| BDNF    | 59.88 (108.75)                              | 60.38 (184.53)                                       | 0.967          |
| EGF     | 2.36 (4.37)                                 | 1.88 (8.49)                                          | 1.000          |
| Eotaxin | 13.58 (8.54)                                | 15.03 (10.22)                                        | 0.410          |
| FGF2    | 1.07 (1.92)                                 | 0.80 (2.91)                                          | 0.879          |
| GMCSF   | 11.26 (15.29)                               | 13.09 (34.34)                                        | 0.397          |
| GROa    | 2.82 (3.83)                                 | 3.48 (4.31)                                          | 0.346          |
| HGF     | 294.75 (486.25)                             | 139.25 (142.43)                                      | <0.001         |
| IFNa    | 0.45 (1.33)                                 | 0.58 (2.14)                                          | 0.712          |
| IFNg    | 9.72 (11.17)                                | 8.29 (6.84)                                          | 0.383          |
| IL1a    | 3.37 (10.83)                                | 1.81 (7.58)                                          | 0.127          |
| IL1b    | 6.31 (10.72)                                | 6.86 (10.09)                                         | 0.208          |
| IL10    | 1.8 (2.85)                                  | 1.73 (2.02)                                          | 0.911          |
| IL12p70 | 3.73 (2.62)                                 | 3.32 (3.25)                                          | 0.985          |
| IL13    | 2.19 (2.55)                                 | 2.06 (3.46)                                          | 0.672          |

|       |                  |                 |       |
|-------|------------------|-----------------|-------|
| IL15  | 9.55 (19.65)     | 13.83 (17.47)   | 0.058 |
| IL17a | 6.35 (18.35)     | 7.32 (12.06)    | 0.303 |
| IL18  | 58.98 (60.39)    | 40.28 (48.09)   | 0.160 |
| IL1RA | 644.67 (1312.68) | 604.75 (961.67) | 0.904 |
| IL2   | 10.91 (17.42)    | 14.64 (20.59)   | 0.185 |
| IL21  | 2.85 (7.97)      | 3.70 (13.81)    | 0.370 |
| IL22  | 6.62 (46.36)     | 2.79 (20.08)    | 0.257 |
| IL23  | 7.99 (7.58)      | 7.67 (10.50)    | 0.717 |
| IL27  | 19.43 (26.49)    | 18.06 (44.09)   | 0.755 |
| IL31  | 5.65 (6.44)      | 5.01 (8.85)     | 0.741 |
| IL4   | 5.60 (4.95)      | 5.76 (7.88)     | 0.851 |
| IL5   | 5.12 (36.16)     | 6.1 (16.84)     | 0.884 |
| IL6   | 9.06 (28.74)     | 15 (20.69)      | 0.270 |
| IL7   | 1.57 (3.01)      | 1.69 (3.01)     | 0.977 |
| IL8   | 2.08 (4.61)      | 2.06 (3.57)     | 0.705 |
| IL9   | 2.21 (2.81)      | 2.03 (4.35)     | 0.834 |
| IP1b  | 53.33 (40.05)    | 45 (47.97)      | 0.794 |
| IP10  | 48.78 (46.14)    | 43 (36.14)      | 0.390 |
| LIF   | 13.48 (20.55)    | 15.70 (16.11)   | 0.997 |
| MCP1  | 48.85 (62.81)    | 35.97 (28.01)   | 0.029 |
| MIP1a | 3.31 (12.61)     | 3.39 (10.98)    | 0.760 |

|        |                  |                |       |
|--------|------------------|----------------|-------|
| NGFb   | 4.36 (2.91)      | 4.08 (3.59)    | 0.975 |
| PDGFBB | 409.08 (1037.63) | 203 (591.37)   | 0.042 |
| PIGF1  | 27.22 (116.59)   | 4.24 (48.78)   | 0.036 |
| RANTES | 23.43 (17.75)    | 21.54 (19.79)  | 0.942 |
| SCF    | 8.42 (9.50)      | 6.51 (5.98)    | 0.408 |
| SDF1a  | 713.92 (742.29)  | 643 (500.75)   | 0.441 |
| TNFa   | 7.56 (11.04)     | 5.85 (11.04)   | 0.736 |
| TNFb   | 3.31 (3.58)      | 3.08 (5.33)    | 0.804 |
| VEGFA  | 205.5 (250.56)   | 105.66 (162.2) | 0.012 |
| VEGFD  | 11.3 (13.23)     | 12.90 (13.34)  | 0.185 |

Continuous variables are represented as [median (interquartile range—IQR)].

**Table S2.** Individual logistic regression model for each cytokines adjusted by gender and age.

| cytokine | <i>p</i> -value | OR    | CI 95% |       |
|----------|-----------------|-------|--------|-------|
|          |                 |       | Low    | High  |
| BDNF     | 0.910           | 0.988 | 0.808  | 1.210 |
| EGF      | 0.841           | 0.984 | 0.838  | 1.155 |
| Eotaxin  | 0.666           | 0.888 | 0.516  | 1.526 |
| FGF2     | 0.882           | 0.987 | 0.828  | 1.176 |
| GMCSF    | 0.336           | 0.894 | 0.711  | 1.124 |
| GROa     | 0.410           | 0.888 | 0.669  | 1.178 |
| HGF      | 0.000           | 2.121 | 1.468  | 3.062 |
| IFNa     | 0.933           | 1.006 | 0.870  | 1.165 |
| IFNg     | 0.303           | 1.230 | 0.830  | 1.822 |
| IL1a     | 0.166           | 1.081 | 0.968  | 1.208 |
| IL1b     | 0.117           | 0.789 | 0.586  | 1.061 |
| IL10     | 0.947           | 1.013 | 0.696  | 1.474 |
| IL12p70  | 0.887           | 1.035 | 0.639  | 1.677 |
| IL13     | 0.608           | 0.941 | 0.746  | 1.187 |
| IL15     | 0.026           | 0.696 | 0.506  | 0.958 |
| IL17a    | 0.267           | 0.872 | 0.685  | 1.110 |

|        |       |       |       |       |
|--------|-------|-------|-------|-------|
| IL18   | 0.222 | 1.212 | 0.890 | 1.652 |
| IL1RA  | 0.993 | 0.999 | 0.830 | 1.203 |
| IL2    | 0.135 | 0.768 | 0.544 | 1.085 |
| IL21   | 0.391 | 0.947 | 0.838 | 1.072 |
| IL22   | 0.401 | 1.038 | 0.951 | 1.133 |
| IL23   | 0.722 | 0.943 | 0.683 | 1.302 |
| IL27   | 0.704 | 0.970 | 0.831 | 1.133 |
| IL31   | 0.754 | 0.956 | 0.723 | 1.265 |
| IL4    | 0.907 | 0.982 | 0.730 | 1.322 |
| IL5    | 0.693 | 1.029 | 0.894 | 1.184 |
| IL6    | 0.241 | 0.858 | 0.664 | 1.108 |
| IL7    | 0.988 | 0.998 | 0.769 | 1.296 |
| IL8    | 0.567 | 0.949 | 0.792 | 1.136 |
| IL9    | 0.974 | 1.005 | 0.752 | 1.342 |
| IP1b   | 0.733 | 0.946 | 0.688 | 1.301 |
| IP10   | 0.713 | 1.064 | 0.766 | 1.477 |
| LIF    | 0.909 | 1.019 | 0.739 | 1.405 |
| MCP1   | 0.022 | 1.598 | 1.071 | 2.384 |
| MIP1a  | 0.994 | 0.999 | 0.830 | 1.203 |
| NGFb   | 0.582 | 1.150 | 0.699 | 1.890 |
| PDGFBB | 0.053 | 1.210 | 0.998 | 1.467 |

|        |       |       |       |       |
|--------|-------|-------|-------|-------|
| PIGF1  | 0.124 | 1.074 | 0.981 | 1.177 |
| RANTES | 0.478 | 1.154 | 0.777 | 1.713 |
| SCF    | 0.452 | 1.148 | 0.801 | 1.645 |
| SDF1a  | 0.686 | 1.040 | 0.861 | 1.256 |
| TNFa   | 0.974 | 0.996 | 0.759 | 1.305 |
| TNFb   | 0.979 | 1.004 | 0.716 | 1.409 |
| VEGFA  | 0.123 | 1.180 | 0.956 | 1.456 |
| VEGFD  | 0.113 | 0.739 | 0.508 | 1.075 |

OR—Odss Ratio; CI—Confidence interval.

**Table S3.** Individual logistic regression model for each clinical characteristic adjusted by gender and age.

| Clinical characteristics | P value | OR    | CI 95% |        |
|--------------------------|---------|-------|--------|--------|
|                          |         |       | Low    | High   |
| Blood Group              |         |       |        |        |
| O Blood Group            | 0.061   | 0.746 | 0.549  | 1.013  |
| Comorbidities            |         |       |        |        |
| Smoking                  | 0.622   | 1.428 | 0.347  | 5.880  |
| Coronary disease         | 1.000   | 1.000 | 0.255  | 3.919  |
| Atrial fibrillation      | 0.916   | 0.929 | 0.237  | 3.640  |
| Diabetes                 | 0.037   | 2.968 | 1.067  | 8.256  |
| Neurological disease     | 0.773   | 1.512 | 0.091  | 25.173 |
| Stroke                   | 1.000   | 0.000 | 0.000  |        |
| Hypertension             | 0.769   | 1.131 | 0.496  | 2.583  |
| Liver disease            | 0.999   | 0.000 | 0.000  |        |
| Obesity                  | 0.023   | 5.363 | 1.254  | 22.936 |
| COPD                     | 0.785   | 1.242 | 0.261  | 5.909  |
| Kidney disease           | 0.360   | 3.151 | 0.270  | 36.797 |
| Laboratory values        |         |       |        |        |
| Glycaemia (mg/dL)        | 0.000   | 1.030 | 1.017  | 1.043  |
| Creatine (mg/dL)         | 0.122   | 1.633 | 0.877  | 3.041  |

|                                 |       |       |       |       |
|---------------------------------|-------|-------|-------|-------|
| Total bilirubin<br>(mg/dL)      | 0.250 | 1.449 | 0.770 | 2.725 |
| Leukocytes ( $\times 10^9/L$ )  | 0.000 | 1.000 | 1.000 | 1.000 |
| Lymphocytes ( $\times 10^9/L$ ) | 0.484 | 1.000 | 1.000 | 1.000 |
| Neutrophil ( $\times 10^9/L$ )  | 0.000 | 1.000 | 1.000 | 1.001 |
| Procalcitonin (ng/ml)           | 0.048 | 2.527 | 1.010 | 6.327 |
| Platelet ( $\times 10^9/L$ )    | 0.932 | 1.000 | 1.000 | 1.000 |
| CRP (mg/L)                      | 0.091 | 1.004 | 0.999 | 1.008 |
| Ferritin ( $\mu g/L$ )          | 0.002 | 1.001 | 1.000 | 1.001 |
| D-dimer (mg/L)                  | 0.050 | 1.000 | 1.000 | 1.000 |
| LDH (mmol/L)                    | 0.000 | 1.007 | 1.003 | 1.011 |

OR—Odds Ratio; CI—Confidence interval.



**Table S4.** Backward logistic regression.

|                                | Effect                        | <i>P</i><br>value | OR    | CI 95% |        |
|--------------------------------|-------------------------------|-------------------|-------|--------|--------|
|                                |                               |                   |       | Lower  | Upper  |
| <b>Intubation or<br/>death</b> | 0 blood-group                 | 0.019             | 0.073 | 0.008  | 0.654  |
|                                | Glycaemia > 134.5 mg/dL       | 0.003             | 15.09 | 2.577  | 88.32  |
|                                | Procalcitonin > 0.07<br>ng/mL | 0.017             | 12.92 | 1.58   | 105.99 |
|                                | Ferritin > 934 µg/L           | 0.039             | 6.91  | 1.1    | 43.5   |
|                                | D-dimer > 1814.5 mg/L         | 0.041             | 13    | 1.11   | 152.04 |
|                                | HGF > 187.5 pg/ml             | 0.025             | 7.38  | 1.28   | 42.4   |
|                                |                               |                   |       |        |        |

CI—confidence interval; OR—Odds ratio.

**Table S5.** Bootstrap for Variables in the Equation.

|                          | <b>B</b> | <b>Bias</b> | <b>Std. Error</b> | <i>p</i> | <b>95% CI</b> |              |
|--------------------------|----------|-------------|-------------------|----------|---------------|--------------|
|                          |          |             |                   |          | <b>Lower</b>  | <b>Upper</b> |
| 0 blood-group            | -2.624   | -10.322     | 22.637            | 0.031    | -86.377       | -0.265       |
| Glycaemia>134.5 mg/dL    | 2.714    | 7.976       | 19.991            | 0.003    | 0.724         | 80.430       |
| Procalcitonin>0.07 ng/mL | 2.559    | 7.854       | 18.129            | 0.001    | 1.124         | 65.326       |
| Ferritin>934 µg/L        | 1.933    | 3.788       | 12.909            | 0.013    | 0.496         | 52.612       |
| D-dimer>1814.5 mg/L      | 2.566    | 10.785      | 21.444            | 0.008    | 0.109         | 79.985       |
| HGF>187.5 pg/ml          | 1.998    | 6.852       | 16.286            | 0.003    | 0.536         | 61.567       |

CI—confidence Interval; B—beta coefficient.
